# Supplementary material for: Synthesis of nitrogen-doped monolayer graphene with high transparent and n-type electrical properties
Source: Royal Society of Chemistry journal article supplement (doi:10.1039/c5tc01046b), 2015-01-01
Supplement: c5tc01046b1.pdf [file c5tc01046b1.pdf]

## Supporting Information

### Synthesis of nitrogen-doped monolayer graphene with high transparent and n-type electrical properties

Bing He,<sup>a</sup> Zhongjie Ren,<sup>b</sup> Chenze Qi,<sup>a</sup> Shouke Yan<sup>\*b</sup> and Zhaohui Wang<sup>\*c</sup>

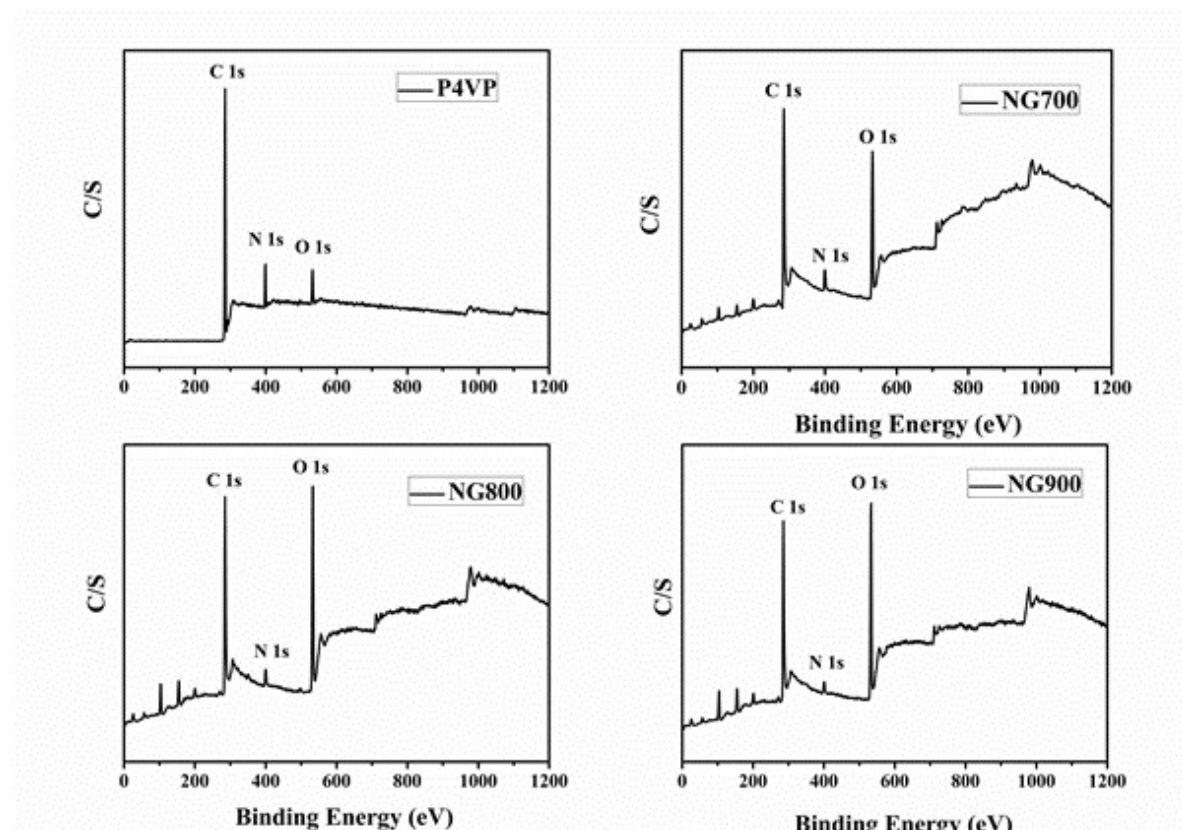

Figure S1. XPS spectra of P4VP, NG700, NG800 and NG900, respectively.
